1 **Longitudinal white matter alterations in SIVmac239 infected**  
2 **rhesus monkeys with and without regular cART treatment**

3 Jiaojiao Liu<sup>1#</sup>, Benedictor Alexander Nguchu<sup>2#</sup>, Dan Liu<sup>3</sup>, Yu Qi<sup>1</sup>, Alixire<sup>4</sup>, Shuai  
4 Han<sup>1</sup>, Yuxun Gao<sup>1</sup>, Xiaoxiao Wang<sup>2</sup>, Hongwei Qiao<sup>5</sup>, Chao Cai<sup>1</sup>, Xiaojie Huang<sup>5\*</sup>,  
5 Hongjun Li<sup>1,3\*</sup>

6  
7 1 Department of Radiology, Beijing YouAn Hospital, Capital Medical University,  
8 Beijing, 100069, China

9 2 Center for Biomedical Imaging, University of Science and Technology of China,  
10 Hefei, China

11 3 Department of Radiology, Renji Hospital, Shanghai Jiaotong University School of  
12 Medicine, Shanghai 200001, China

13 4 Beijing Advanced Innovation Centre for Biomedical Engineering, Beihang  
14 University, Beijing, 100191, China Beijing Key Laboratory of Brain Imaging and  
15 Connectomics, Beijing Normal University, Beijing, 100875, China

16 5 Institute of Laboratory Animal Sciences, CAMS&PUMC, Beijing 100050, China

17 # These authors contributed equally to the work.

18 Corresponding author:

19 \*Xiaojie Huang, Beijing YouAn Hospital, Capital Medical University, Beijing,  
20 100069, China. [huangxiaojie78@ccmu.edu.cn](mailto:huangxiaojie78@ccmu.edu.cn).

21 \*Hongjun Li, Department of Radiology, Beijing YouAn Hospital, Capital Medical  
22 University, Beijing, 100069, China; Beijing Advanced Innovation Centre for  
23 Biomedical Engineering, Beihang University, Beijing, 100191, China.

24 Telephone number: 86-10-83997727

25 E-mail: [lihongjun00113@ccmu.edu.cn](mailto:lihongjun00113@ccmu.edu.cn)

26

27 **Abstract**

28 **Objective:** We use the SIV-mac239 infected Chinese rhesus monkeys  
29 to longitudinally investigate white matters alterations with and  
30 without regular combined antiretroviral therapy (cART) treatment,  
31 and its relationship with clinical tests.

32 **Material and methods:** Diffusion tensor imaging (DTI), CD4 T cell  
33 counts, and CD4/CD8 were obtained at baseline, 10 days, 4th  
34 week, 12th week, 24th week, and 36th week post virus inoculation.

35 postinfection (wpi). Microstructural properties were examined  
36 within 76 white matter defined by DTI-WM atlas for rhesus  
37 macaques. Corrections for multiple comparisons were performed  
38 using a false discovery rate ( $p < 0.05$ , FDR). Correlation analyses  
39 between imaging markers and clinical measures (CD4 T-cell counts,  
40 CD4/CD8 ratio) were determined using Pearson's correlations.

41 **Results:** In our model, White matter alterations in SIV-infected  
42 macaques can be detected as soon as 4 weeks post inoculation in  
43 several brain regions. And with time proceeding, the cART can  
44 reverse, relieve, or even progressive effects. CD4 T-cell count is  
45 mainly associated with DTI metrics before the cART, whereas  
46 CD4/CD8 ratio was associated with white matter alteration with and  
47 without cART.

48 **Conclusion:** SIV-mac239 infection can be an ideal model to explore  
49 HIV induced HIV associated brain alterations, and the first group of  
50 white matter alterations was as soon as 4 weeks post inoculation in  
51 structure next to the periventricular area. As the time progressed,  
52 cART can bring different effect to each region, including reversed,  
53 relieved, and even progressive effects. In addition, these changes are  
54 closely linked to CD4/CD8 ratio even after cART.

55 **Importance:**

56 Key words: SIV-mac239 infected Chinese rhesus monkeys;

57 Diffusion tensor imaging; White matter alterations; combined  
58 antiretroviral therapy; CD4/CD8 ratio.

### 59 ***1. Introduction***

60 HIV can shortly invade the central nervous system (CNS) after  
61 seroconversion, it can activate microglia and macrophage cells to  
62 release toxic factors including excitotoxins, viral products, cytokines  
63 and chemokines, resulting in prominent inflammation, immune  
64 activation and suppression, and blood–brain barrier disruption, [1-3]  
65 which will damage neurons, reflected by cerebral white matter  
66 structure alterations. The application of combination antiretroviral  
67 therapy (cART), has transformed HIV from a fatal illness into a  
68 chronic, manageable condition [4], and may reverse and prevent  
69 milder impairments (ANI and MND) to some extent. However, the  
70 iatrogenic effects of drugs on brain integrity are also of concern [5,6].  
71 Importantly, previous studies have shown axonal disruption and  
72 synaptic injury in HIV patients [7,8]. Diffusion Tensor Imaging (DTI)  
73 is a widely used non-invasive neuroimaging technique, which is  
74 highly sensitive to microstructural alterations [9]. Previous studies  
75 have shown decreased fractional anisotropy (FA), increased mean  
76 diffusivity (MD) throughout the brain of HIV-infected  
77 patients.[10-21] Even in patients with effective antiretroviral  
78 therapies. [11,22] Wherever, there is also study found no significant

79 differences between HIV-infected and healthy controls [23], and  
80 some researchers stated that the application of cART did not seem to  
81 prevent or reverse existing brain damage. [24-26] However, most  
82 the current studies were cross-sectional with several confounders,  
83 including but not limited to path of infection, inclusion criteria,  
84 duration of infection, complications, different treatment regimens  
85 and patient noncompliance, which are difficult to control [13,17,18].  
86 Moreover, the uncertainty of the definite infection data and  
87 symptoms, most of the alteration are in months or even years after  
88 infection, there is a must for study to investigate early changes in the  
89 brain of HIV individual. So longitudinal study with controlled  
90 covariations should be conducted to settle the above problem and  
91 further to through light upon mechanisms underlying the dynamic  
92 alterations with and without the application of cART.

93 To address the issue, an appropriate animal model with  
94 pathological mechanism parallel to HIV patients can be used.  
95 Studies have shown that the pathology of simian immunodeficiency  
96 virus (SIV)-infected Chinese rhesus monkey was quite similar to  
97 that of HIV-infected patients, especially in the disturbance of the  
98 central nervous system (CNS), and cognitive or behavioral deficits,  
99 and development of AIDS[27-29]. In addition, previous DTI studies  
100 on SIV-infected rhesus monkeys have exhibited metric abnormalities

101 similar to that of HIV patients[30,31].

102 In our present study, we aimed to dynamically examine the white  
103 mater alterations of SIV-mac239 infected Chinese rhesus monkeys  
104 with and without regularly cART treatment, the relationship between  
105 DTI metrics and clinical tests (including CD4 T cell counts,  
106 CD4/CD8) of different time points.

107

## 108 ***2. Material and methods***

### 109 ***2.1 Animal screening prior to main experiments***

110 This study is approved by Beijing Municipal Sciences & Technology  
111 Commission. Ten rhesus monkeys were enrolled in the current  
112 longitudinal study. Prior to administration to the longitudinal procedure,  
113 health screening and indirect immunofluorescent assay (IFA) were  
114 conducted on all the rhesus monkeys to confirm the healthy conditions  
115 and exclude the possible infection of simian immunodeficiency (SIV),  
116 simian type-D retrovirus (SRV) or simian T-cell lymphotropic virus-I  
117 (STLV-I).

### 118 ***2.2 Animal model of SIV-infected rhesus monkey and data collection***

119 All the monkeys were inoculated intravenously with SIV-mac239 and  
120 were observed regularly. The baseline was defined two weeks before  
121 inoculation. Immunological characteristics including peripheral blood  
122 CD4<sup>+</sup>, CD8<sup>+</sup> T-cell counts were collected at the baseline, the 1<sup>st</sup> week post  
123 virus inoculation, the 5<sup>th</sup> week post virus inoculation, the 12<sup>th</sup> week post

124 virus inoculation, the 24<sup>th</sup> week post virus inoculation and the 36<sup>th</sup> week  
125 post virus inoculation. CD4<sup>+</sup>/CD8<sup>+</sup> ratio were calculated based on the  
126 T-cell counts. MRI scans were acquired at the baseline, 10 days post virus  
127 inoculation, the 4<sup>th</sup> week post virus inoculation, the 12<sup>th</sup> week post virus  
128 inoculation, the 24<sup>th</sup> week post virus inoculation and the 36<sup>th</sup> week post  
129 virus inoculation.

130 The monkeys were randomly assigned into two groups of therapy  
131 group (five monkeys) and control group (five monkeys). All the monkeys  
132 were anesthetized by intramuscular injection of ketamine hydrochloride  
133 (5-10mg/kg) before each data collection of immunological characteristics,  
134 laboratory biochemical characteristics and MRI scan. The five monkeys  
135 in therapy group received ART of FTC (50mg/kg/d), TDF (5.1mg/kg/d)  
136 and DTG (2.5mg/kg/d) between the third and fourth time points (40 days  
137 post virus inoculation).

### 138 ***2.3 Housing environment of the subject***

139 All the animals were housed at Institute of laboratory animal  
140 sciences, PUMC (Peking Union Medical College) under the same  
141 housing standards as that in previous studies [21, 22] including housing  
142 temperature maintained at 16~26°C; humidity maintained at 40~70%;  
143 12h/12h light/dark cycle; water provided ad libitum; formula feeds  
144 provided on a twice-daily regimen without dietary restrictions.

### 145 ***2.3 DTI data analysis***

146 **2.3.1 MR protocol**

147 MRI scans were conducted at Beijing YouAn Hospital, Capital Medical  
148 University with a 3T Siemens Tim TRIO whole-body magnetic resonance  
149 scanner (Siemens, Germany) at each time point to longitudinally assess  
150 the impact of SIV infection on brain. The monkeys were anesthetized and  
151 placed in the supination position during the MRI scans. T1 weighted  
152 images were collected with a turbo flash sequence. The parameters were:  
153 repetition time/echo time (TR/TE) =2200/3.54 ms, FOV=128 mm×128  
154 mm, data matrix=192×192, flip angle=9°, slice thickness=1 mm (voxel  
155 size=1×1×1.0 mm<sup>3</sup>). DTI images were acquired with a gradient echo  
156 single-shot echo planar imaging (EPI). The parameters were: repetition  
157 time/echo time (TR/TE) =5200/100ms, FOV=152 mm×152mm, data  
158 matrix=76×76, flip angle=90°, slice thickness=2mm (voxel  
159 size=2×2×2mm<sup>3</sup>), time points=10min52s.

160 **2.3.2. Macaque Image Processing**

161 Macaque DWI data preprocessing was performed according to previous  
162 studies, using the FMRIB Software Library (FSL)  
163 (<https://fsl.fmrib.ox.ac.uk/>) and AFNI (3DSkullStrip for skull-stripping  
164 monkey brain data). The DWI raw data preprocessing was conducted to  
165 correct eddy currents, susceptibility-induced distortions, and animal  
166 movements. The data were then fitted using DIT-tensor fitting technique  
167 available in FSL. Four types of diffusivity maps were generated:

168 fractional anisotropy (FA), a measure of the directionality of water  
169 diffusion; mean diffusivity (MD), a measure of the water diffusivity in the  
170 transverse directions[32](Chang et al., 2020). Each of these macaque's  
171 diffusivity maps(FA, MD) was registered to the standard space template,  
172 the diffusion-tensor-based white matter atlas for rhesus macaques (also  
173 known as UWDTIRhesusWMAAtlas,  
174 <https://www.nitrc.org/projects/rmdtitemplate/>)[33], using FMRIB's  
175 Linear/Non-linear Image Registration Tools (FLIRT/FNIRT), part of the  
176 FSL version 5.09 [34]. The template is population-based developed from  
177 a large number of animal high-quality scans (N=271) that allows it to  
178 account for variability in the species; It has a high signal-to-noise ratio  
179 (SNR) and FA values, and high image sharpness with visible small white  
180 matter structures and spatial features [33]. Two neurologists (X.W. and  
181 B.N., with 8 and 4 years of experience, respectively) inspected the data  
182 visually to confirm the registration accuracy

### 183 ***2.3.3. Regions of Interest (ROIs) Selection and WM Microstructural*** 184 ***Property Analysis***

185 Microstructural properties were examined within 76 white matter defined  
186 by DTI-WM atlas for rhesus macaques. All WM structures were assessed  
187 in our analyses. Each WM region of interest (ROI) was analyzed  
188 longitudinally for changes across time. These microstructural changes  
189 were examined at baseline and after at baseline, 10 days, 4 weeks,12



190 weeks , 24 weeks , and 36 weeks post virus inoculation.

191

192

193

194

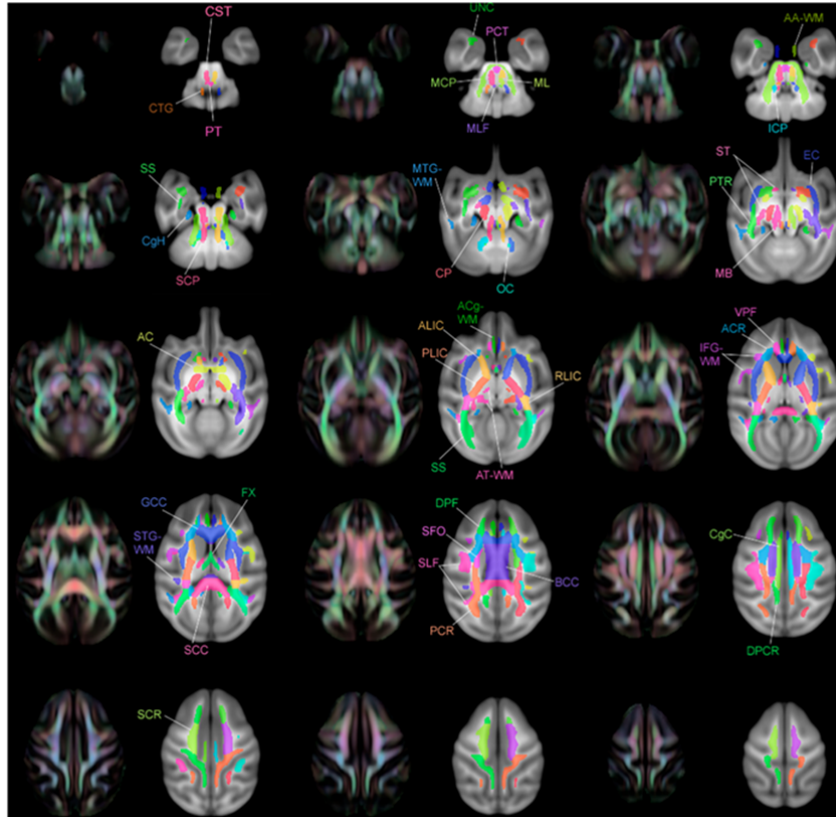

195

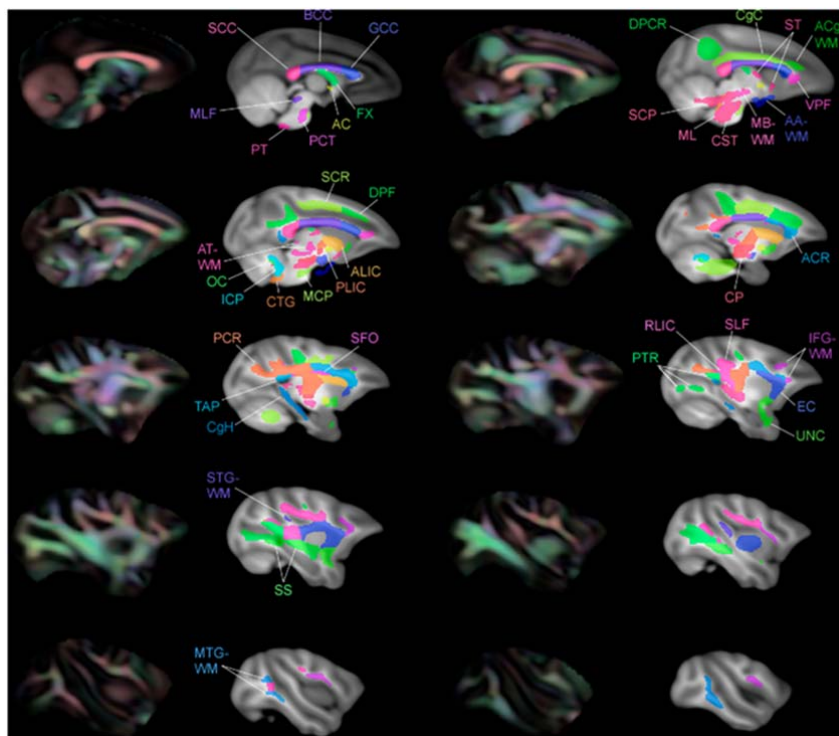

196

197

198 Figure 1. Multiple slices of atlas overlaid on T1-W template illustrating  
199 the regions of interest (ROIs) beside FA color image. These ROI images  
200 were adapted from Zakszewski et al. [33]

#### 201 2.3.4. Statistical analyses

202 Statistical analyses were performed on SPSS software [IBM SPSS  
203 Statistics for Windows, version 20.0 (IBM Corporation, Armonk, New  
204 York, USA)]. Group differences between Macaque having cART and  
205 those without cART, the effect of time on microstructural properties,  
206 and the interaction effect of cART treatment and time were determined  
207 using the Two-factor mixed-design ANOVA. Of 10 monkeys infected  
208 with HIV, 5 were randomly assigned to undergo cART treatment and the  
209 other 5 received no treatment. Hence, the between-subjects factor had two

210 levels. Over 36 week period, microstructural properties were measured at  
211 six time points, representing six levels of the "within-subjects" factor.  
212 These levels were: the baseline [time point 1], after 10 days [time point 2],  
213 4 weeks [time point 3], 12 weeks [time point 4], 24 weeks [time point-5],  
214 and 36 weeks, at the end of the programme [time point-6].  
215 Corrections for multiple comparisons were performed using a false  
216 discovery rate ( $p < 0.05$ , FDR). Correlation analyses between imaging  
217 markers and clinical measures (CSF Viral Load, Plasma Viral Load, CD4  
218 T-cell counts, CD8 T-cell counts, CD4/CD8 ratio) were determined using  
219 Pearson's correlations.

## 220 **Results**

### 221 ***Longitudinal DTI alterations in macaque without treatment [Figure 2]***

222 In our study, we longitudinally study the white matter alteration from the  
223 baseline, 10 days post inoculation, 4 weeks post inoculation, 12 weeks  
224 post inoculation the infection, 24 weeks post inoculation the infection,  
225 and 36 weeks post inoculation. We found that the alteration was firstly  
226 examined in 4 weeks after inoculation insuperior temporal gyrus (STG)  
227 ( $p=0.029244$ ), posterior limb of internal capsule (left) (PLIC-L)  
228 ( $p=0.023222$ ), fornix(FX) ( $p=0.041225$ ), cerebral peduncle left  
229 ( $p=0.0173969$ ), cerebral peduncle right ( $p=0.024109$ ), left anterior limb of  
230 internal capsule(ALIC-L) ( $p= 0.0162715$ ), right anterior limb of internal  
231 capsule(ALIC-R) ( $p= 0.01556$ )and right sagittal striatum(SS-R) ( $p=$

232 0.0190229) on FA, and adjacent amygdala white matter  
233 (AA-WM-RR) ( $p=0.004665$ ), posterior limb of internal capsule -left  
234 (PLIC-L) ( $p= 0.0232217$ ) ( $p= 0.0451514$ ) and right sagittal striatum (SS-R)  
235 ( $p= 0.0292208$ ) on MD. While 24 weeks post inoculation we found the  
236 alterations were then appeared on the regions of posterior limb of the  
237 internal capsule-right (PLIC-R) ( $p= 0.0426243$ ), genu of corpus callosum  
238 (GCC) ( $p=0. 0.0192415$ ), body of corpus callosum (BCC) ( $p=0.032449$ ),  
239 external capsule-left (EC-L) ( $p= 0.01540547$ ) ( $p= 0.0447482$ ),  
240 striaterminus-right (ST-R) on FA ( $p= 0.0029465$ ), and PLIC-R ( $p=$   
241  $0.016532$ ) ( $p= 0.0328549$ ) on MD.

242

### 243 ***Longitudinal DTI alterations in macaque on regular cART***

244 After cART, we found that there were no alterations in BCC, FX for FA  
245 and MD, no progression in AA-WM-R for MD, and PLIC-R, PLIC-L for  
246 FA, progression was slow in STG-WM-L, GCC, CP-R, CP-L, no effect in  
247 PLICR, ALIC-R, SS-R, ST-R. Alternatively, in EC-L.

248

### 249 ***Correlation between Altered DTI properties on regular cART and*** 250 ***clinical metrics [Table 1]***

251 We examined the relationship between clinical measures, such as CD4+ T  
252 cell counts and CD4/CD8 ratio, and the altered DTI metrics with great  
253 significance in cART-treated macaques. We confirmed that increased MD

254 and FA are with decreased CD4+T cell counts in Only one region in  
255 AA-WM-R ( $p=0.073927$ ,  $R=-0.84149$ ). And positive relation only for  
256 ST-R ( $p= 0.06211$ ,  $R= 0.859125$ ). Also, for CD4/CD8 ratio, we found  
257 increased MD is with low CD4/CD8 ratio in GCC ( $p=0.045843$ ,  
258  $R=-0.8852612$ ), ALIC-R ( $p= 0.057912$ ,  $R= -0.86564256$ ), PLIC-L ( $p=$   
259  $0.0144217$ ,  $R=-0.94726$ ), ALIC-L ( $p= 0.0422815$ ,  $R= -0.891353$ ), and  
260 positive relations in ST-R( $p= 0.06211$ ,  $R= 0.859125$ ) and  
261 AA-WM-R( $p=0.026141$ ,  $R=0.90225$ ), with regularcART treatment. As  
262 for FA, CP-R( $p= 0.0238721$ ,  $R= 0.9260468$ ) and CP-L( $p= 0.0369919$ ,  $R=$   
263  $0.900711$ ) ( $p= 0.0309355$ ,  $R= 0.91197044$ ) showed positive relation.

264 ***Correlation between Altered DTI properties without treatment and***  
265 ***clinical metrics[Table 2]***

266 We also estimated the correlation between clinical measures, such as  
267 CD4+ T cell counts and CD4/CD8 ratio, and the altered DTI metrics  
268 with great significance. We found that decreased FA was with decreased  
269 CD4+ T cell counts in PLIC-L ( $p=0.014916$ ,  $R=0.946059$ ), PLIC-R ( $t_1$ ,  
270  $p=0.034230$ ,  $R=0.9057661$ ), CP-R ( $p= 0.0167576$ ,  $R= 0.94168096$ ) in  
271 monkeys without treatment. Increased MD is with low CD4+ T cell  
272 counts in PLIC-R( $p=0.0202919$ ,  $R= -0.933691$ ) ( $p= 0.0517050$ ,  $R=$   
273  $-0.87555$ ), and PLIC-L ( $p=0.0588879$ ,  $R=-0.86411685$ ), except for the  
274 positive relation STG-WM-L( $p= 0.0027277$ ,  $R= 0.9826859$ ). As for  
275 CD4/CD8 ratio, increased MD was with decreased CD4/CD8 in

276 PLIC-R( $p= 0.02027519$ ,  $R= -0.93372$ ), FX ( $t_1$ ,  $p= 0.0500745$ ,  $R=$   
277  $-0.8782170$ ), and ST-R( $p= 0.058177$ ,  $R= -0.865228$ ).

278

## 279 *Discussion*

280 In the current study, longitudinal cerebral white matter structure  
281 alterations were assessed in 10 SIV-mac239 infected monkeys with and  
282 without regular cART treatment. We found significant white matter  
283 structure alterations in these monkeys, consisted of higher mean diffusion  
284 and lower fractional anisotropy, as conducted by DTI. TBSS showed that  
285 these effects were progressive with time. In addition, we found that the  
286 disturbance of white matter was appeared as early as 4 weeks post  
287 inoculation, and that with regular cART the damage can be alleviated or  
288 even reversed. Furthermore, DTI metric alterations were significantly  
289 correlated with clinical measures such as CD4 T cell counts, CD4/CD8.

290 The underlying etiology of white matter alterations in HIV  
291 individuals is still unclear. Possible pathophysiologic mechanism include  
292 but not limit to synaptodendritic injury, inflammation, demyelination, and  
293 even microvascular abnormalitis correlated to concomitant  
294 cardiovascular risk factors, especially hypertension. In the context of HIV  
295 based on DTI acquisition parameters, FA reflects the aspect of axonal  
296 structural integrity reflecting cytoskeleton and membrane integrity[35]  
297 and proposed structural integrity ofrocytic[36]. MD was interpreted as  
298 related to the degree of WM microstructure density[35, 37], such as

299 extracellular space between WM tracts[36] that may be affected by  
300 neuroinflammation including glial involvement and myelin loss to a  
301 lesser extent. In this case, myelin contribution to MD changes is  
302 debatable[36] as massive demyelination is not a common feature of  
303 HIV-related brain injury even in those who had severe HIV  
304 encephalopathy[38] Previous studies on HIV patients and matched  
305 healthy controls have shown subtle but widespread white matter  
306 alterations, especially findings of alterations in fractional anisotropy and  
307 mean diffusion [39-49], suggesting disorganization of the micro- and  
308 macro-structure of the white matter. [50]

309       However, few studies have explored the original time and first  
310 groups of regions that the white matter have been destroyed, and what  
311 happened after early cART (as early as 40 days post inoculation), all of  
312 which can throw light upon the underlying neuropathological mechanism,  
313 and illustrate the effect of timely cART on imaging findings, immune  
314 indicators and the relationship between them. In our study, we  
315 longitudinally study the white matter alteration of rhesus monkeys with  
316 and without regular cART treatment from the baseline, 10 days, 4 weeks,  
317 12 weeks, 24 weeks, and 36 weeks post inoculation. In our present study,  
318 we found that the alteration was firstly examined in 4 weeks after  
319 inoculation in Amygdala, superior temporal gyrus (STG), posterior limb  
320 of internal capsule (left), fornix, bilateral cerebral peduncle, and bilateral

321 anterior limb of internal capsule on FA, and posterior limb of internal  
322 capsule -left (PLIC-L) and right sagittal striatum (SS-R) on MD, which  
323 suggest that these regions are more sensitive to SIV infection. Studies  
324 have shown that HIV enters the central nervous system via monocytes  
325 and perivascular macrophages very early after seroconversion. The virus  
326 then replicates and induces neuronal damage mainly by  
327 neuroinflammatory mechanisms triggered by infected microglial cells,  
328 and the inflammation selectively occurs in the dopamine-rich areas of the  
329 brain including the subcortical areas, particularly the dopamine-rich basal  
330 ganglia and induces a subcortical dementia. [51-54] Our findings of  
331 alternated FA in Amygdala and sagittal striatum, which are parts of the  
332 basal ganglia, is consistent with this body of work. The fornix is a major  
333 efferent tract of the hippocampus, a structure critical for normal memory  
334 function, which has been reported on AD, schizophrenia, and multiple  
335 sclerosis. Microstructural alteration of the fornix is a contributor to early  
336 episodic memory dysfunction in non-demented individuals[55-58].  
337 Internal capsule is a region that is sensitive to WM damage in those with  
338 cognitive impairment and AIDS. [59] [78]Previous study also reported  
339 that the higher HIV RNA density of infected macrophages was mostly in  
340 the subcorticle white matter including IC. [60] In addition, many studies  
341 have also reported white matter injury (i.e., decreased FA or increased  
342 MD) in the subcortical white matter, particularly of the internal capsule.



343 [61-65] As for the alteration of cerebellar peduncle and sagittal stratum,  
344 previous Study on adolescent had obtained similar changes[66].

345 While in 12 weeks post inoculation, regions of PLIC-R, GCC, BCC,  
346 EC-L, and ST-R showed significant changes on FA, and PLIC-R on MD.

347 Early cerebral infiltration of HIV can occur before antiretroviral  
348 medications are administered, exposing the surrounding white matter to  
349 the neurotoxic effects before effective viral suppression. It has been  
350 suggested that the periventricular white matter such as CC is especially  
351 vulnerable to viral attack owing to its proximity to cerebrospinal fluid,  
352 which is an HIV reservoir that can carry the virus within 8 days of  
353 infection[67,68,69]. Studies also showed that the highest density of HIV  
354 infected macrophages was in the subcortical white matter including CC.

355 [70] Consistent with this early impact on the brain, white matter  
356 degradation has been found within the first 100 days after HIV  
357 transmission[71]. As a major communication pathway between the  
358 hemispheres, the CC is responsible for the functional integration of  
359 complex cognitive, motor, and behavioral tasks. So the observation of CC  
360 can be an indicator of underlying neurocognitive disorder of HIV  
361 individuals. External capsule serves as pathway for psychomotor  
362 functions, many previous studies have shown alternated external capsule  
363 in HIV patients. [72,73]

364 After cART, we found that initial alteration in BCC and FX  
365 disappeared, no progression in AA-WM-R, PLIC-R, PLIC-L, progression  
366 was slow in STG-WM-L, GCC, CP-R, CP-L, no effect in PLICR,  
367 ALIC-R, SS-R, ST-R. Alternatively, in EC-L, we found that cART can  
368 damage the structure to some extent. White matter repair afforded by viral  
369 suppression and cART could lead to greater degree of axonal structural  
370 integrity that is above normal effects of aging. This may be particularly  
371 possible in the internal capsule as it is a region that is sensitive to white  
372 matter damage in those with cognitive impairment and AIDS. [59] The  
373 lack of aggressive HIV associated WM damage in the CC after cART  
374 suggested that early treatment is neuroprotective to the CC to some extent.  
375 [74] On one hand, cART may contribute to synaptic injury via oxidative  
376 stress as has been demonstrated in vitro and in animal models[75]. On the  
377 other hand, early and continuous antiretroviral therapy can be  
378 neuroprotective, limiting the damage to white matter. [76,77]

379 In our study, we found that decreased CD4<sup>+</sup> T cell counts were with  
380 decreased FA value and increased MD value in patients without cART  
381 treatment, however after early and regular cART treatment, there was no  
382 significant changes between CD4 T cell counts and DTI metrics,  
383 indicating that absolute CD4 T cell counts may fail to accurately reflect  
384 the risks threatening HIV individuals since immune dysfunction persists  
385 with normalization of CD4 counts. [78] In addition, we found that

386 increased MD was with decreased CD4/CD8 in many brain regions,  
387 including GCC, ALIC-R, PLIC-L, ALIC-L, PLIC-R, and FX, in  
388 macaques with and without regular cART treatment. To our best  
389 knowledge, the lower CD4<sup>+</sup>/CD8<sup>+</sup> ratio could be attributed to the  
390 persistent inflammation and immunosenescence caused by viral  
391 infection[79] and can also be used as a biomarker for T-cell activation to  
392 characterize the migration of T cells into the CNS after HIV infection and  
393 the production of inflammatory cytokines, which can indirectly lead to  
394 white matter damage. Our result indicated that in the cART era,  
395 CD4/CD8 maybe a more sensitive clinical biomarker for assessing risks  
396 facing the modern aviremic HIV population. [80]

397

### 398 ***Limitations and further consideration***

399 Firstly, our study failed to record cognitive performance, for it takes  
400 a lot of time to train the monkeys for specified tasks, which limited us to  
401 explore the underlying mechanism of neurocognitive dysfunctions and the  
402 correlations among them with DTI metrics and clinical tests. In addition,  
403 the small sample size limited us for effective statistic analyses. So in the  
404 future study, we would include a lager sample of macques.

405

### 406 ***In conclusion***

407 SIV-mac239 infection can be an ideal model to explore HIV induced  
408 HIV associated brain alterations, and the first group of white matter  
409 alterations was as soon as 4 weeks post inoculation in structure next to  
410 the periventricular area. And alterations progressed with time proceeding,  
411 cART can bring different effects to each region, including reversed,  
412 relieved, and even progressive effects. In addition, these changes are  
413 closely linked to CD4/CD8 ratio even after cART. Further studies are in  
414 great need to illustrate underlying mechanism behind them.

415

416

#### 417 **Ethic statement**

418 The study was approved by the Institutional Animal Care and Use  
419 Committee (IACUC) at the Institute of Laboratory Animal Science,  
420 Chinese Academy of Medical Sciences (IACUC Approval No:  
421 LHJ18001), and performed according to the recommendations in the  
422 Guide for the Care and Use of Laboratory Animals of the Institute of  
423 Laboratory Animal Science and the recommendations of the Weatherall  
424 report for the use of nonhuman primates in research  
425 ([http://www.acmedsci.ac.uk/more/news/the-use-of-nonhuman-primates-in-](http://www.acmedsci.ac.uk/more/news/the-use-of-nonhuman-primates-in-research/)  
426 [research/](http://www.acmedsci.ac.uk/more/news/the-use-of-nonhuman-primates-in-research/)) to ensure personal safety and animal welfare. All macaques  
427 were housed and fed in an Association for Assessment and Accreditation  
428 of Laboratory Animal Care (AAALAC)-accredited bio-safety level 3  
429 laboratory.

430 **Conflict of interest**

431 Authors declare that they have no conflict of interest.

432 **Data and materials availability**

433 All data are available in the main text.

434 **Acknowledgements**

435 This work was supported by the National Natural Science Foundation of  
436 China (grant nos. 61936013); the Beijing Natural Science Foundation  
437 (7212051).

438 **References**

- 439 1. Gendelman, H. E., Lipton, S. A., Tardieu, M., Bukrinsky, M. I. & Nottet, H. S. The  
440 neuropathogenesis of HIV-1 infection. *J. Leukoc. Biol.* 1994;56, 389–398
- 441 2. Gendelman, H. E. & Tardieu, M. Macrophages/ microglia and the pathophysiology of CNS  
442 injuries in AIDS. *J. Leukoc. Biol.* 1994;56:387–388
- 443 3. Kaul, M., Garden, G. A. & Lipton, S. A. Pathways to neuronal injury and apoptosis in  
444 HIV-associated dementia. *Nature*, 2001; 410, 988–994
- 445 4. Ellis R, Langford D, Masliah E. HIV and antiretroviral therapy in the brain: neuronal injury and  
446 repair. *Nat Rev Neurosci.* 2007;8(1):33-44.
- 447 5. Kahouadji Y, Dumurgier J, Sellier P, Lapalus P, Delcey V, Bergmann JF, et al. Cognitive  
448 function after several years of antiretroviral therapy with stable central nervous system penetration  
449 score. *Hiv Med* 2013; 14:311–315.
- 450 6. Brier MR, Wu Q, Tanenbaum AB, Westerhaus ET, Kharasch ED, Ances BM. Effect of HAART  
451 on brain organization and function in HIV-negative subjects. *J Neuroimmune Pharm* 2015;  
452 10:517–521.
- 453 7. Avdoshina V, Bachis A, Mocchetti I. 2013. Synaptic dysfunction in human immunodeficiency  
454 virus type-1-positive subjects: inflammation or impaired neuronal plasticity? *J Intern Med*  
455 273:454–46
- 456 8. Everall I, Vaida F, Khanlou N, Lazzaretto D, Achim C, Letendre S, Morgello S. 2009.  
457 Cliniconeuropathologic correlates of human immunodeficiency virus in the era of antiretroviral  
458 therapy. *J Neurovirol* 15:360–370
- 459 9. Filippi C, Ulug A, Ryan E, Ferrando S, Van Gorp W. Diffusion tensor imaging of patients with  
460 hiv and normal-appearing white matter on mr images of the brain. *AJNR Am J Neuroradiol.* 2001;  
461 22(2):277–283.
- 462 10. Filippi CG, Ulug AM, Ryan E, Ferrando SJ, van Gorp W. Diffusion tensor imaging of HIV  
463 patients and normal-appearing white matter onMR images of the brain. *AJNR Am J Neuroradiol*  
464 2001;22:277–283.

- 465 11. Wu Y, Storey P, Cohen BA, Epstein LG, Edelman RR, Ragin AB. Diffusion alterations in  
466 corpus callosum of patients with HIV. *AJNR Am JNeuroradiol* 2006;27:656–660.
- 467 12. Pomara N, Crandall DT, Choi SJ, Johnson G, Lim KO. White matter abnormalities in  
468 HIV-1infection: a diffusion tensor imaging study. *Psychiatry Res* 2001;106:15–24.
- 469 13. Ragin AB, Storey P, Cohen BA, Epstein LG, Edelman RR. Whole brain diffusion tensor  
470 imaging in HIV-associated cognitive impairment. *AJNR Am J Neuroradiol* 2004;25:195–200.
- 471 14. Ragin AB, Wu Y, Storey P, Cohen BA, Edelman RR, Epstein LG. Diffusion tensor imaging of  
472 subcortical brain injury in patients infected with human immunodeficiency virus. *J Neurovirol*  
473 2005;11:292–298.
- 474 15. Gongvatana A, Schweinsburg BC, Taylor MJ, et al. White matter tract injury and cognitive  
475 impairment in human immunodeficiency virus– infected individuals. *J Neurovirol* 2009;15:187–  
476 195.
- 477 16. Chen Y, An H, Zun H, et al. White matter abnormalities revealed by diffusion tensor imaging  
478 in non-demented and demented HIV1 patients. *Neuroimage* 2009;47:1154–1162.
- 479 17. Stubbe-Drager B, Deppe M, Mohammadi S, et al. Early microstruc- tural white matter  
480 changes in patients with HIV: a diffusion tensor imaging study. *BMC Neurol* 2012;12:23.
- 481 18. Thurnher MM, Castillo M, Stadler A, Rieger A, Schmid B, Sundgren PC. Diffusion-tensor MR  
482 imaging of the brain in human immunodeficiency virus–positive patients. *AJNR Am J Neuroradiol*  
483 2005;26:2275–2281.
- 484 19. Nir, T. M., Jahanshad, N., Busovaca, E., Wendelken, L., Nicolas, K., Thompson, P. M., &  
485 Valcour, V. G. (2014). Mapping white matter integrity in elderly people with HIV. *Human Brain*  
486 *Mapping*, 35(3), 975–992.
- 487 20. Towgood, K. J., Pitkanen, M., Kulasegaram, R., Fradera, A., Kumar, A., Soni, S., ... Kopelman,  
488 M. D. (2012). Mapping the brain in younger and older asymptomatic HIV-1 men: Frontal volume  
489 changes in the absence of other cortical or diffusion tensor abnormalities. *Cortex*, 48(2), 230–241
- 490 21. Seider, T. R., Gongvatana, A., Woods, A. J., Chen, H., Porges, E. C., Cummings, T., ... Cohen,  
491 R. A. Age exacerbates HIV-associated white matter abnormalities. *Journal of Neurovirology*,  
492 2016;22(2), 201–212
- 493 22. Avdoshina V, Bachis A, Mocchetti I. 2013. Synaptic dysfunction in human immunodeficiency  
494 virus type-1-positive subjects: inflammation or impaired neuronal plasticity? *J Intern Med*  
495 273:454–46
- 496 23. Zhuang Y, Qiu X, Wang L, Ma Q, Mapstone M, Luque A, Weber M, Tivarus M, Miller E,  
497 Arduino RC, et al. Combination antiretroviral therapy improves cognitive performance and  
498 functional connectivity in treatment- naïve HIVinfected individuals. *J Neuro-Oncol.*  
499 2017;23(5):704–12
- 500 24. Ances BM, Ortega M, Vaida F, Heaps J, Paul R. Independent effects of HIV, aging, and  
501 HAART on brain volumetric measures. *J Acquir Immune Defic Syndr* 2012;59:469.
- 502 25. Harezlak J, Buchthal S, Taylor M, Schifitto G, Zhong J, Daar ES, Cohen R. Persistence of  
503 HIV-associated cognitive impairment, inflammation and neuronal injury in era of highly active  
504 antiretroviral treatment. *AIDS* 2011;25:625.
- 505 26. Heaton RK, Franklin DR, Ellis RJ, McCutchan JA, Letendre SL, LeBlanc S, Collier AC.  
506 HIV-associated neurocognitive disorders before and during the era of combination antiretroviral  
507 therapy: differences in rates, nature, and predictors. *J Neurovirol* 2011;17:3–16
- 508 27. Burudi EM, Fox HS. Simian immunodeficiency virus model of HIV-induced central nervous

- 509 system dysfunction. *Adv Virus Res.* 2001; 56:435–68.
- 510 28. Desrosiers RC. The simian immunodeficiency viruses. *Annu Rev Immunol.* 1990; 8:557–78.
- 511 29. Zink MC, Spelman JP, Robinson RB, Clements JE. SIV infection of macaques—modeling the  
512 progression to AIDS dementia. *J Neurovirol.* 1998; 4(3):249–59.
- 513 30. Tang Z, Dong E, Liu J, Liu Z, Wei W, Wang B, et al. Longitudinal assessment of fractional  
514 anisotropy alterations caused by simian immunodeficiency virus infection: a preliminary diffusion  
515 tensor imaging study. *J Neurovirol.* 2016;22(2):231-9.
- 516 31. Li C, Zhang X, Komery A, Li Y, Novembre F, Herndon J. Longitudinal diffusion tensor  
517 imaging and perfusion MRI investigation in a macaque model of neuro-AIDS: A preliminary study.  
518 *NeuroImage.* 2011;58:286–292.
- 519 32. Chang, K., Premeaux, T. A., Cobigo, Y., Milanini, B., Hellmuth, J., Rubin, L. H., . . . Valcour,  
520 V. Plasma inflammatory biomarkers link to diffusion tensor imaging metrics in virally suppressed  
521 HIV-infected individuals. *Aids,* 2020;34(2), 203-213.
- 522 33. Zakszewski, E., Adluru, N., Tromp, D. P., Kalin, N., & Alexander, A. L.. A  
523 diffusion-tensor-based white matter atlas for rhesus macaques. *Plos One,* (2014;9(9), e107398.
- 524 34. Jenkinson, M., Beckmann, C. F., Behrens, T. E., Woolrich, M. W., & Smith, S. M. *Fsl.*  
525 *Neuroimage,* 2012;62(2), 782-790.
- 526 [35] Winston GP. The physical and biological basis of quantitative parameters derived from  
527 diffusion MRI. *Quant Imaging Med Surg* 2012;2:254–265
- 528 [36] Lentz MR, Peterson KL, Ibrahim WG, Lee DE, Sarlls J, Lizak MJ, Maric D, Reid WC,  
529 Hammoud DA. Diffusion tensor and volumetric magnetic resonance measures as biomarkers of  
530 brain damage in a small animal model of HIV. *PLoS One.* 2014;9:e105752
- 531 [37] Zhu T, Zhong J, Hu R, Tivarus M, Ekholm S, Harezlak J, Ombao H, Navia B, Cohen R,  
532 Schifitto G. Patterns of white matter injury in HIV infection after partial immune reconstitution: a  
533 DTI tract based spatial statistics study. *J Neuro-Oncol* 2013; 19:10–23
- 534 [38] Pelle MT, Bazille C, Gray F. Neuropathology and HIV Dementia. In: *Handbook of Clinical*  
535 *Neurology.* Elsevier, 2008;pp. 807–818
- 536 [39] Filippi CG, Ulug a M, Ryan E, Ferrando SJ, van Gorp W. Diffusion tensor imaging of  
537 patients with HIV and normal appearing white matter on MR images of the brain. *AJNR Am J*  
538 *Neuroradiol* 2001; 22:277–283.
- 539 [40] Pfefferbaum A, Rosenbloom MJ, Adalsteinsson E, Sullivan EV. Diffusion tensor imaging with  
540 quantitative fibre tracking in HIV infection and alcoholism comorbidity: synergistic white  
541 matter damage. *Brain* 2007; 130:48–64.
- 542 [41] Müller-Oehring EM, Schulte T, Rosenbloom MJ, Pfefferbaum A, Sullivan EV. Callosal  
543 degradation in HIV-1 infection predicts hierarchical perception: a DTI study. *Neuropsychologia*  
544 2010;48:1133–1143.
- 545 [42] Thurnher MM, Castillo M, Stadler A, Rieger A, Schmid B, Sundgren PC. Diffusion-tensor  
546 MR imaging of the brain in human immunodeficiency virus-positive patients. *AJNR Am J*  
547 *Neuroradiol* 2005; 26:2275–2281.
- 548 [43] Wu Y, Storey P, Cohen BA, Epstein LG, Edelman RR, Ragin AB. Diffusion alterations in  
549 corpus callosum of patients with HIV. *AJNR Am J Neuroradiol* 2006; 27:656–660.
- 550 [44] Stebbins GT, Smith CA, Bartt RE, Kessler HA, Adeyemi OM, Martin E, et al. HIV-associated  
551 alterations in normal-appearing white matter. *J Acquir Immune Defic Syndr* 2007; 46:564–573.
- 552 [45] Chang L, Wong V, Nakama H, Watters M, Ramones D, Miller EN, et al. Greater than



- 553 age-related changes in brain diffusion of HIV patients after 1 year. *J Neuroimmune Pharmacol*  
554 2008;3:265–274.
- 555 [46]Du H, Wu Y, Ochs R, Edelman RR, Epstein LG, McArthur J, et al. A comparative evaluation  
556 of quantitative neuroimaging measurements of brain status in HIV infection. *Psychiatry Res*  
557 2012;203:95–99.
- 558 [47]Zhu T, Zhong J, Hu R, Tivarus M, Ekholm S, Harezlak J, et al. Patterns of white matter injury  
559 in HIV infection after partial immune reconstitution: a DTI tract-based spatial statistics  
560 study. *J Neurovirol* 2013; 19:10–23.
- 561 [48]Nir TM, Jahanshad N, Busovaca E, Wendelken L, Nicolas K, Thompson PM, et al. Mapping  
562 white matter integrity in elderly people with HIV. *Hum Brain Mapp* 2014; 35:975–992.
- 563 [49]Wright PW, Vaida FF, Fernández RJ, Rutlin J, Price RW, Lee E, et al. Cerebral white matter  
564 integrity during primary HIV infection. *AIDS* 2015; 29:433–442.
- 565 [50]Chiang MC, Dutton RA, Hayashi KM, Lopez OL, Aizenstein HJ, Toga AW, Becker JT,  
566 Thompson PM. 3D pattern of brain atrophy in HIV/AIDS visualized using tensor-based  
567 morphometry. *Neuroimage*. 2007;34:44–60.
- 568 [51] Schouten J, Cinque P, Gisslen M, Reiss P, Portegies P. HIV-1 infection and cognitive  
569 impairment in the ART era: a review. *AIDS* 2011;25:561-575
- 570 [52] Purohit V, Rapaka R, Frankenheim J, Avila A, Sorensen R, Rutter J. National Institute on  
571 Drug Abuse symposium report: drugs of abuse, dopamine, and HIV-associated neurocognitive  
572 disorders/HIV-associated dementia. *J Neurovirol* 2013;19:119-122
- 573 [53] Mediouni S, Marcondes MC, Miller C, McLaughlin JP, Valente ST. The cross-talk of HIV-1  
574 Tat and methamphetamine in HIV-associated neurocognitive disorders. *Front Microbiol*  
575 2015;6:1164
- 576 [54] E Koutsilieri I, C Scheller, V ter Meulen, P Riederer. Monoamine oxidase inhibition and  
577 CNS immunodeficiency infection. *Neurotoxicology*. 2004;25(1-2):267-70.
- 578 [55]Zhuang L, Wen W, Trollor JN, Kochan NA, Reppermund S, Brodaty H, Sachdev P.  
579 Abnormalities of the fornix in mild cognitive impairment are related to episodic memory loss. *J*  
580 *Alzheimers Dis*. 2012;29(3):629-39.
- 581 [56]Fornix damage limits verbal memory functional compensation in multiple sclerosis.Kern KC,  
582 Ekstrom AD, Suthana NA, Giesser BS, Montag M, Arshanapalli A, Bookheimer SY, Sicotte  
583 NL.*Neuroimage*. 2012 Feb 1;59(3):2932-40.
- 584 [57]The relation between fornix injury and memory impairment in patients with diffuse axonal  
585 injury: a diffusion tensor imaging study.Chang MC, Kim SH, Kim OL, Bai DS, Jang  
586 SH.*NeuroRehabilitation*. 2010;26(4):347-53.
- 587 [58]Diffusion tractography of the fornix in schizophrenia.Fitzsimmons J, Kubicki M, Smith K,  
588 Bushell G, Estepar RS, Westin CF, Nestor PG, Niznikiewicz MA, Kikinis R, McCarley RW,  
589 Shenton ME.*Schizophr Res*. 2009 Jan;107(1):39-46. doi: 10.1016/j.schres.2008.10.022. Epub  
590 2008 Nov 30.
- 591 [59]Gongvatana A, Schweinsburg BC, Taylor MJ, Theilmann RJ, Letendre SL, Alhassoon OM,  
592 Jacobus J, Woods SP, Jernigan TL, Ellis RJ, Frank LR, Grant I, The CGWhite matter tract injury  
593 and cognitive impairment in human immunodeficiency virus-infected individuals. *J Neurovirol*  
594 2009;15:187–195.
- 595 [60]Human immunodeficiency virus (HIV) distribution in HIV encephalitis: study of 19 cases  
596 with combined use of in situ hybridization and immunocytochemistry.Gosztonyi G, Artigas J,



597 Lamperth L, Webster HD *J Neuropathol Exp Neurol.* 1994; 53(5):521-34.  
598 [61]DTI studies in HIV have reported white matter injury (i.e., decreased FA or increased MD) in  
599 the subcortical white matter, particularly of the frontal lobes, the genu and splenium of the corpus  
600 callosum, and the internal capsule (Filippi et al, 1998; Pomara et al, 2001; Thurnher et al, 2005;  
601 Wu et al, 2006; Pfefferbaum, et al 2007; Chang et al, 2008).  
602 [62]White matter abnormalities in HIV-1 infection: a diffusion tensor imaging study.  
603 Pomara N, Crandall DT, Choi SJ, Johnson G, Lim KO *Psychiatry Res.* 2001 Feb 28; 106(1):15-24.  
604 [63]Diffusion-tensor MR imaging of the brain in human immunodeficiency virus-positive patients.  
605 Thurnher MM, Castillo M, Stadler A, Rieger A, Schmid B, Sundgren PC. *JAJNR Am J*  
606 *Neuroradiol.* 2005 Oct; 26(9):2275-81.  
607 [64]Diffusion alterations in corpus callosum of patients with HIV. Wu Y, Storey P, Cohen BA,  
608 Epstein LG, Edelman RR, Ragin AB *AJNR Am J Neuroradiol.* 2006 Mar; 27(3):656-60.  
609 [65]Diffusion alterations in corpus callosum of patients with HIV. Wu Y, Storey P, Cohen BA,  
610 Epstein LG, Edelman RR, Ragin AB *AJNR Am J Neuroradiol.* 2006 Mar; 27(3):656-60.  
611 [66]Hoare J, Fouche J, Phillips N, Joska J, Myer L, Zar H, Stein D. Structural brain changes in  
612 perinatally HIV-infected young adolescents in South Africa. *AIDS.* 2018 Nov  
613 28;32(18):2707-2718.  
614 [67]Li, R. L., Sun, J., Tang, Z. C., Zhang, J. J., & Li, H. J. Axonal chronic injury in treatment -  
615 naive HIV plus adults with asymptomatic neurocognitive impairment and its relationship with  
616 clinical variables and cognitive status. *BMC Neurology*, 2018;18:66.  
617 [68]Su, T., Caan, M. W., Wit, F. W., Schouten, J., Geurtsen, G. J., Cole, J. H., AGEHIV Cohort  
618 Study . (2016). White matter structure alterations in HIV - 1 - infected men with sustained  
619 suppression of viraemia on treatment. *AIDS*, 30(2), 311 - 322.  
620 [69]Shiramizu, B., Gartner, S., Williams, A., Shikuma, C., Ratto - Kim, S., Watters, M., ...  
621 Valcour, V. (2005). Circulating proviral HIV DNA and HIV - associated dementia. *AIDS*, 19(1),  
622 45 - 52.  
623 [70] Gosztonyi G, Artigas J, Lamperth L, Webster HD. Human immunodeficiency virus (HIV)  
624 distribution in HIV encephalitis: study of 19 cases with combined use of in situ hybridization and  
625 immunocytochemistry. *J Neuropathol Exp Neurol.* 1994;53(5):521-34.  
626 [71]Ragin, A. B., Wu, Y., Gao, Y., Keating, S., Du, H., Sammet, C. Epstein, L. G. Brain alterations  
627 within the first 100 days of HIV infection. *Annals of Clinical Translational Neurology*, 2015;2(1),  
628 12-21.  
629 [72]Paul R, Tsuei T, Cho K, Belden A, Milanini B, Bolzenius J, Javandel S, McBride Joseph,  
630 Cysique L, Lesinski S, Valcour Victor. Ensemble machine learning classification of daily living  
631 abilities among older people with HIV. *EClinicalMedicine.* 2021;35:100845.  
632 [73]Sullivan EV, Rosenbloom MJ, Rohlfing T, Kemper CA, Deresinski S, Pfefferbaum A.  
633 Pontocerebellar contribution to postural instability and psychomotor slowing in HIV infection  
634 without dementia. *Brain Imaging Behav.* 2011;5(1):12-24.  
635 [74]Shana A. Hall,corresponding author 1 Ryan P. Bell, 1 Simon W. Davis, 2 Sheri L. Towe, 1  
636 Taylor P. Ikner, 1 and Christina S. Meade . Human immunodeficiency virus - related decreases in  
637 corpus callosal integrity and corresponding increases in functional connectivity. *Hum Brain Mapp.*  
638 2021; 42(15): 4958-4972.  
639 [75] Ivanov AV, Valuev-Elliston VT, Ivanova ON, Kochetkov SN, Starodubova ES, Bartosch B,  
640 Isaguliant MG.. Oxidative Stress during HIV Infection: Mechanisms and Consequences. *Oxid*

641 Med Cell Longev. 2016;2016:8910396.  
642 [76]Ackermann C, Andronikou S, Saleh MG, Laughton B, Alhamud AA, van der Kouwe A, et al.  
643 Early Antiretroviral Therapy in HIV-Infected Children Is Associated with Diffuse White Matter  
644 Structural Abnormality and Corpus Callosum Sparing. American Journal of Neuroradiology 2016;  
645 37:2363–2369.  
646 [77] Marcin Jankiewicz, Martha J. Holmes, Paul A. Taylor, Mark F. Cotton,3 Barbara Laughton,  
647 André J. W. van der Kouwe, and Ernesta M. Meintjes. White Matter Abnormalities in Children  
648 with HIV Infection and Exposure Front Neuroanat. 2017; 11: 88.  
649 [78] Young J, Psychogiou M, Meyer L, Gutierrez F, Obel N, et al. Opportunistic Infections Project  
650 Team of the Collaboration of Observational HIV Epidemiological Research in Europe (COHERE)  
651 in EuroCoord, D4 cell count and the risk of AIDS or death in HIV-infected adults on combination  
652 antiretroviral therapy with a suppressed viral load: a longitudinal cohort study from COHERE.  
653 PLoS Med. 2012; 9(3):31001194  
654 [79]Sainz T., Serrano-Villar S., Díaz L., González Tomé M. I., Gurbindo M. D., de José M. I., et al.  
655 (2013). The CD4/CD8 ratio as a marker T-cell activation, senescence and activation/exhaustion in  
656 treated HIV-infected children and young adults. AIDS 27 1513–1516.  
657 [80] McBride J, Striker R. Imbalance in the game of T cells: What can the CD4/CD8 T-cell ratio  
658 tell us about HIV and health? PLoS Pathog. 2017;13(11):e1006624.  
659  
660

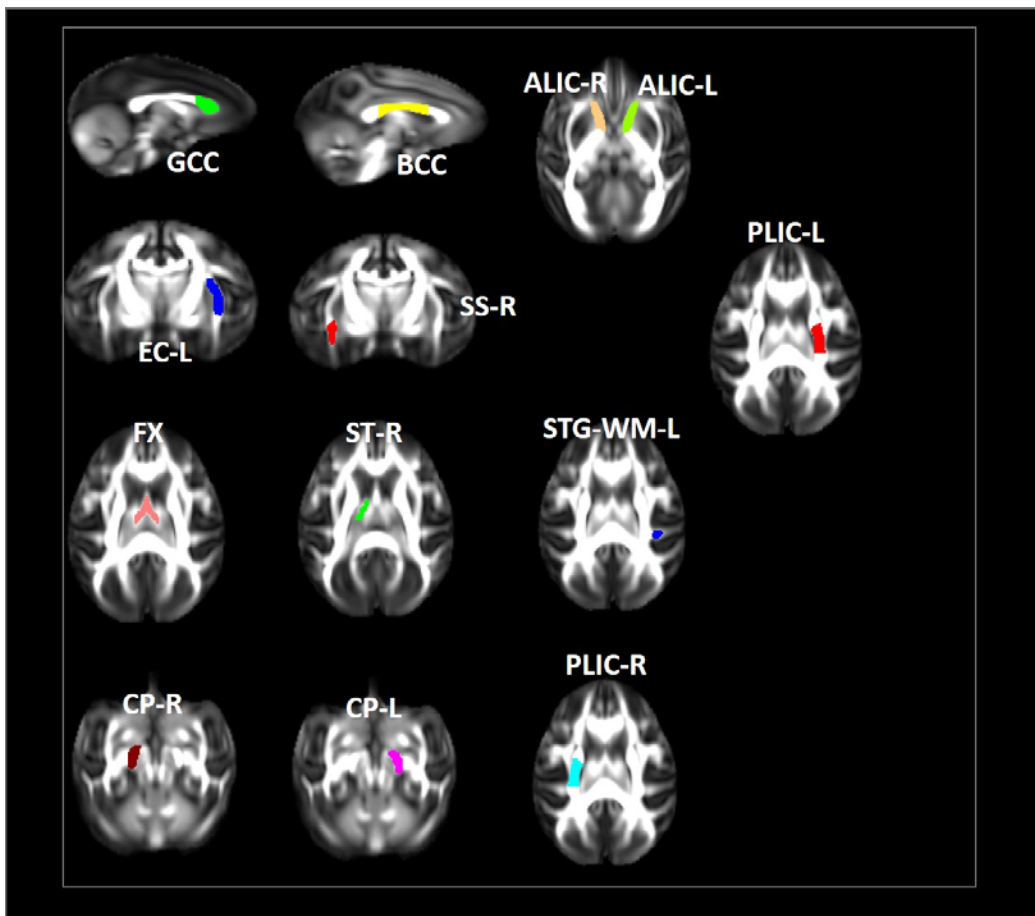

661

662 Figure 2 Changes in microstructures propagate differentially in SIV-macaques with and without  
663 antiretroviral therapy.

664  
665  
666  
667  
668

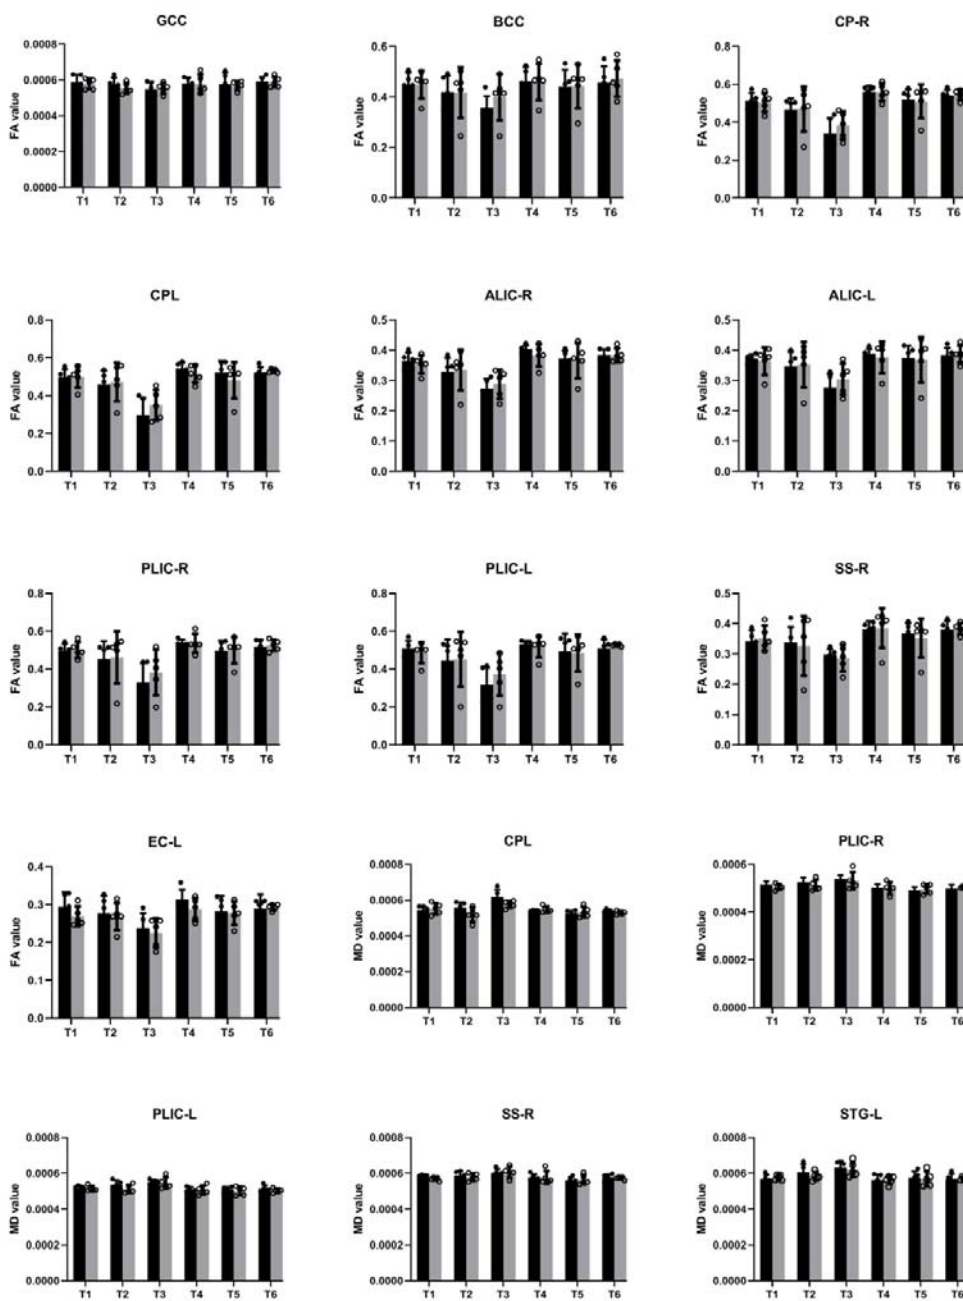

669  
670  
671

Fig3. Illustration of significant alterations of FA and MD across time incART+ andcART+ groups.

672 Bars, mean  $\pm$  SE. Black, SIV-mac239 infected macaques without treatment; Gray, SIV-mac239  
 673 infected macaques with regular treatment. Note: T1 the baseline; T2, 10 days post virus  
 674 inoculation; T3, the 4th week post virus inoculation; T4, the 12th week post virus inoculation; T5,  
 675 the 24th week post virus inoculation; T6, the 36th week post virus inoculation.

676  
 677  
 678  
 679

680 Table1 The correlations between DTI metrics and clinical tests with regular ART treatment.

| Target region |         | CD4 |    | CD4/CD8     |           |
|---------------|---------|-----|----|-------------|-----------|
|               |         | r   | p  | r           | p         |
| MD            | GCC     | NA  | NA | -0.8852612  | 0.045843  |
|               | ALIC-R  | NA  | NA | -0.86564256 | 0.057912  |
|               | PLIC-L  | NA  | NA | -0.94726    | 0.0144217 |
|               | ALIC-L  | NA  | NA | -0.891353   | 0.0422815 |
|               | ST-R    | NA  | NA | 0.859125    | 0.06211   |
|               | AA-WM-R | NA  | NA | 0.90225     | 0.026141  |
| FA            | CP-R    | NA  | NA | 0.9260468   | 0.0238721 |
|               | CP-L    | NA  | NA | 0.900711    | 0.0369919 |

694 Note: NA means without significant correlation. GCC, Genu of Corpus Callosum; ALIC-R,  
 695 Anterior Limb of the Internal Capsule - Right ; PLIC-L, Posterior Limb of the Internal Capsule -  
 696 Left ; ALIC-L, Anterior Limb of the Internal Capsule - Left; ST-R, Stria Terminalis - Right ;  
 697 AA-WM-R, Adjacent Amygdala White Matter - Right; CP-R, Cerebral Peduncle - Right; CP-L,  
 698 Cerebral Peduncle - Left..

699

700 Table2 The correlations between DTI metrics and clinical tests without treatment.

| Target region |          | CD4         |           | CD4/CD8    |            |
|---------------|----------|-------------|-----------|------------|------------|
|               |          | r           | p         | r          | p          |
| MD            | PLIC-R   | -0.933691   | 0.0202919 | NA         | NA         |
|               | PLIC-L   | -0.86411685 | 0.0588879 | NA         | NA         |
|               | STG-WM-L | 0.9826859   | 0.0027277 | NA         | NA         |
|               | PLIC-R   | NA          | NA        | -0.93372   | 0.02027519 |
|               | FX       | NA          | NA        | -0.8782170 | 0.0500745  |
|               | ST-R     | NA          | NA        | -0.865228  | 0.058177   |
| FA            | PLIC-L   | 0.946059    | 0.014916  | NA         | NA         |
|               | PLIC-R   | 0.9057661   | 0.034230  | NA         | NA         |
|               | CP-R     | 0.94168096  | 0.0167576 | NA         | NA         |

715 Note: NA means without significant correlation. PLIC-R, Posterior Limb of the Internal Capsule –

716 Right; PLIC-L, Posterior Limb of the Internal Capsule – Left; STG-WM-L, Superior Temporal  
717 Gyrus WM – Left ; PLIC-R, Posterior Limb of the Internal Capsule – Right; FX, Fornix; ST-R,  
718 Stria Terminalus – Right; CP-R, Cerebral Peduncle – Right.
